# Supplementary material for: Electrode architectures for high capacity multivalent conversion compounds: iron (ii and iii) fluoride
Source: Royal Society of Chemistry journal article supplement (doi:10.1039/c3ra47266c), 2014-01-01
Supplement: c3ra47266c.pdf [file c3ra47266c.pdf]

## Electrode Architectures for High Capacity Multivalent Conversion Compounds: Iron (II and III) Fluoride

Surendra K. Martha, Jagjit Nanda, Hui Zhou, Juan C. Idrobo, Nancy J. Dudney, Sreekanth Pannala, Sheng Dai, Junjie Wang, Paul. V. Braun

5

### Supplementary figures and tables

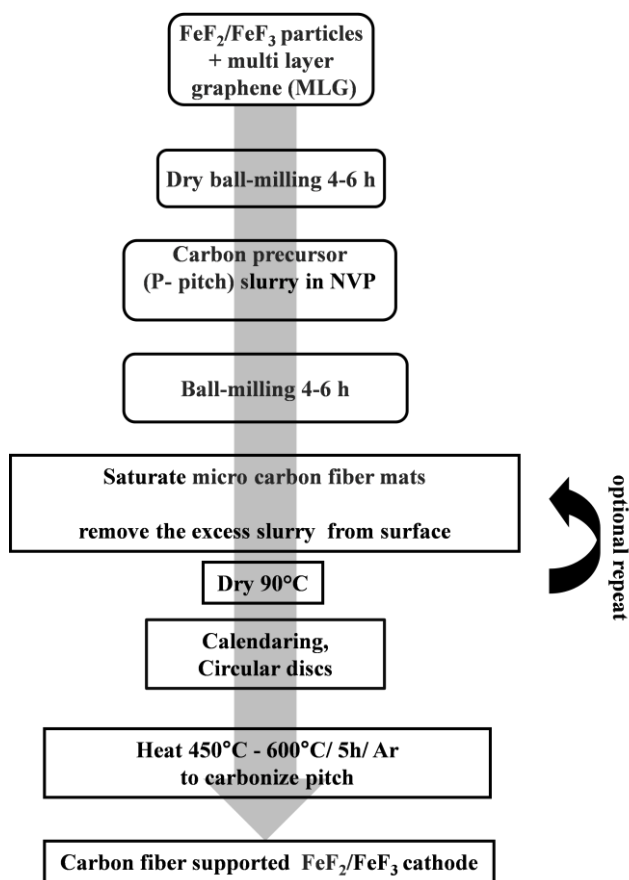

10 **Figure S1.** Schematics of electrode fabrication process for Iron (II) and (III) fluoride cathodes

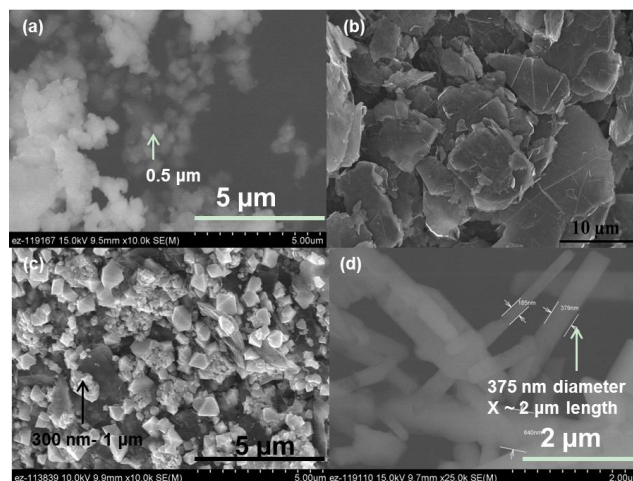

15 **Figure S2.** SEM images showing typical shapes and sizes of FeF<sub>2</sub> and FeF<sub>3</sub> particles and electrodes (a) Pristine FeF<sub>3</sub> powder (as received), (b) pristine MLG, (c) pristine FeF<sub>3</sub>-after electrode fabrication at 600°C, (d) Pristine FeF<sub>2</sub> powder (as received).

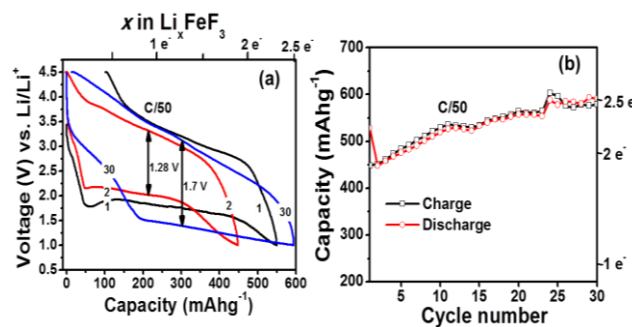

20 **Figure S3.** (a) Voltage vs. capacity profiles of a Li/FeF<sub>3</sub> cell (on carbon fiber) cycled between 1.0 V and 4.5 V (C/50 rate) at 25°C. (b) Capacity plotted as a function of cycle number for the Li/FeF<sub>3</sub> cell.

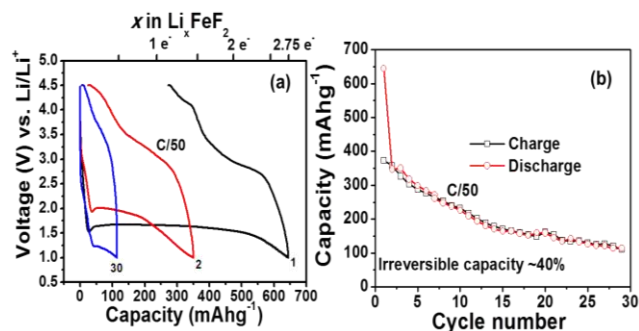

**Figure S4.** (a) Voltage vs. capacity profiles of a Li/FeF<sub>2</sub> cell (on Al-foil) cycled between 1.0 V and 4.5 V (C/50 rate) at 25°C. (b) Capacity plotted as a function of cycle number for the Li/FeF<sub>2</sub> cell. Electrode Composition: FeF<sub>2</sub> (50%), Graphene (40%), PVDF (10%) on Al foil.

| Parameters                                        | 1.5 V-4.5V at 25°C       | 1.0 V-4.5V at 25°C                                          | 1.5 V-4.5V at 60°C       | 2.3 V-4.5V at 25°C       | 2.3 V-4.5V at 60°C (1.5V cut off) |
|---------------------------------------------------|--------------------------|-------------------------------------------------------------|--------------------------|--------------------------|-----------------------------------|
| Irreversible capacity loss (ICL) (%)              | 7.5                      | 14.5                                                        | ~25                      |                          |                                   |
| 1 <sup>st</sup> cycle lithiation capacity (mAh/g) | 465                      | 528                                                         | 685                      | 35 (1.5V)                | 175                               |
| Highest reversible capacity (mAh/g)               | 445 (~2 e <sup>-</sup> ) | 595 (2.5 e <sup>-</sup> )                                   | 692 (~3 e <sup>-</sup> ) | 150 (1.5V)<br>192 (1.0V) | 235 (1 e <sup>-</sup> )           |
| Hysteresis (V)                                    | 0.9-1.0                  | 1.3 (2 <sup>nd</sup> cycle)<br>1.7 (30 <sup>th</sup> cycle) | 0.8                      | 0.4 (1.5V)<br>1.5 (1.0V) | 0.35                              |
| Specific Energy (Wh kg <sup>-1</sup> )            | 990-1010                 | 1060                                                        | 1650                     | 460 (1.5V)<br>535 (1.0V) | 740                               |

**Table S1:** Irreversible capacity loss, 1<sup>st</sup> lithiation capacity, reversible capacity, hysteresis and specific energy of FeF<sub>3</sub> at various cut-off voltages and temperatures.

The electrochemical performance at 60 °C for the slurry coated FeF<sub>3</sub> electrode is shown below in figure S5.

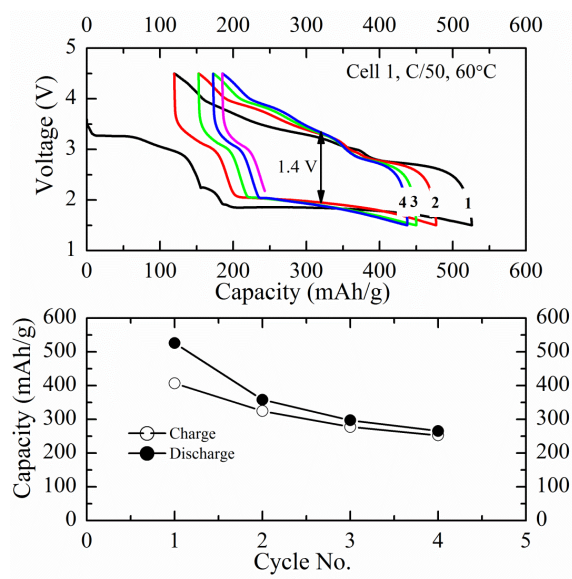

**Figure S5** 60 °C cycling performance of the FeF<sub>3</sub> slurry coated electrode on Al current collector.
